# Supplementary material
Source: PubMed Central journal article supplement (PMC4305466)
Supplement: NIHMS618336-supplement-01.pdf [file NIHMS618336-supplement-01.pdf]

**Table S1. Participant Characteristics by Quartiles of Serum Bicarbonate for Total Population**

| Characteristic                             | Serum Bicarbonate (mEq/L) |             |             |             | P      |
|--------------------------------------------|---------------------------|-------------|-------------|-------------|--------|
|                                            | < 24                      | 24 – 25     | 25.1 – 26.9 | ≥ 27        |        |
| <b>Number</b>                              | 2573                      | 2355        | 2711        | 2085        |        |
| <b>Age (years)</b>                         | 42 (0.4)                  | 45 (0.3)    | 46 (0.3)    | 49 (0.6)    | <0.001 |
| <b>Women (%)</b>                           | 59 (1.2)                  | 52 (1.2)    | 46 (0.9)    | 37 (1.2)    | <0.001 |
| <b>Race/Ethnicity (%)</b>                  |                           |             |             |             | 0.06   |
| <i>Non-Hispanic White</i>                  | 71 (2.3)                  | 71 (2.3)    | 71 (2.1)    | 73 (1.6)    |        |
| <i>Mexican American</i>                    | 9.7 (1.6)                 | 8.0 (1.0)   | 7.4 (0.8)   | 5.0 (0.7)   |        |
| <i>Non-Hispanic Black</i>                  | 9.6 (1.4)                 | 9.9 (1.2)   | 11.0 (1.0)  | 11.7 (1.1)  |        |
| <b>Body-mass index (kg/m<sup>2</sup>)</b>  | 29.2 (0.2)                | 28.0 (0.2)  | 27.7 (0.2)  | 26.8 (0.1)  | <0.001 |
| <b>Poverty (&lt;100% poverty index, %)</b> | 15.1 (1.0)                | 12.5 (1.1)  | 12.2 (0.8)  | 9.8 (1.0)   | <0.001 |
| <b>Less than high-school diploma (%)</b>   | 20.5 (1.0)                | 18.6 (0.8)  | 19.9 (1.0)  | 18.4 (0.9)  | 0.2    |
| <b>Activity Level (MET-min/wk, %)</b>      |                           |             |             |             | 0.05   |
| 0                                          | 16.2 (1.0)                | 14.5 (0.9)  | 16.7 (1.0)  | 15.3 (0.9)  |        |
| < 500                                      | 22.3 (1.1)                | 21.1 (1.0)  | 18.6 (0.8)  | 20.3 (0.9)  |        |
| 500 – 2000                                 | 34.6 (1.1)                | 34.5 (1.0)  | 37.3 (1.0)  | 34.5 (1.1)  |        |
| > 2000                                     | 26.8 (1.3)                | 29.8 (1.1)  | 27.4 (1.3)  | 29.9 (1.3)  |        |
| <b>Smoking (%)</b>                         |                           |             |             |             | <0.001 |
| <i>Never</i>                               | 49.2 (2.2)                | 49.4 (1.3)  | 52.3 (1.1)  | 53.3 (1.2)  |        |
| <i>Former</i>                              | 21.7 (1.2)                | 24.7 (1.0)  | 24.9 (1.0)  | 27.8 (1.2)  |        |
| <i>Current</i>                             | 29.2 (1.6)                | 25.9 (1.2)  | 22.7 (0.9)  | 19.0 (1.1)  |        |
| <b>Estimated NEAP (mEq/day)</b>            | 60.8 (0.6)                | 60.2 (0.7)  | 56.1 (0.6)  | 53.9 (0.7)  | <0.001 |
| <b>Fasting length ≤2 hours (%)</b>         | 2.7 (0.4)                 | 2.4 (0.4)   | 3.6 (0.5)   | 3.8 (0.5)   | 0.03   |
| <b>Diuretic use (%)</b>                    | 6.2 (0.6)                 | 7.6 (0.8)   | 9.2 (0.8)   | 15.7 (1.3)  | <0.001 |
| <b>Calcium carbonate use (%)</b>           | 3.9 (0.5)                 | 3.2 (0.6)   | 4.8 (0.5)   | 4.6 (0.8)   | 0.2    |
| <b>Hypertension (%)</b>                    | 37.2 (1.2)                | 36.1 (1.1)  | 38.0 (1.3)  | 43.0 (1.7)  | 0.001  |
| <b>Diabetes Mellitus (%)</b>               | 9.1 (0.7)                 | 7.5 (0.6)   | 8.1 (0.6)   | 8.5 (0.6)   | 0.6    |
| <b>Cardiovascular disease (%)</b>          | 7.0 (0.5)                 | 6.8 (0.6)   | 7.8 (0.7)   | 7.6 (0.5)   | 0.3    |
| <b>eGFR (mL/min/1.73m<sup>2</sup>)</b>     | 97.0 (0.6)                | 95.0 (0.5)  | 93.9 (0.5)  | 91.0 (0.7)  | <0.001 |
| <b>UACR &gt; 30 mg/g (%)</b>               | 9.6 (0.5)                 | 9.1 (0.7)   | 8.2 (0.6)   | 8.3 (0.8)   | 0.1    |
| <b>Serum albumin (g/dL)</b>                | 4.31 (0.01)               | 4.33 (0.01) | 4.37 (0.01) | 4.41 (0.02) | <0.001 |
| <b>Serum calcium (mg/dL)</b>               | 9.42 (0.02)               | 9.51 (0.02) | 9.48 (0.02) | 9.54 (0.02) | <0.001 |
| <b>Serum phosphate (mg/dL)</b>             | 3.66 (0.02)               | 3.71 (0.02) | 3.63 (0.01) | 3.65 (0.02) | 0.2    |
| <b>C-reactive protein ≥ 1.0 mg/dL (%)</b>  | 11.2 (0.8)                | 7.9 (0.6)   | 8.2 (0.8)   | 7.4 (0.6)   | <0.001 |

|                                      |              |              |              |              |        |
|--------------------------------------|--------------|--------------|--------------|--------------|--------|
| <b>Lumbar BMD (g/cm<sup>2</sup>)</b> | 1.05 (0.004) | 1.04 (0.004) | 1.05 (0.003) | 1.05 (0.004) | 0.9    |
| <b>Total BMD (g/cm<sup>2</sup>)</b>  | 1.14 (0.004) | 1.14 (0.004) | 1.14 (0.003) | 1.15 (0.004) | 0.07   |
| <b>Total lean body mass (kg)</b>     | 50.6 (0.3)   | 50.4 (0.3)   | 51.5 (0.3)   | 51.9 (0.3)   | <0.001 |

---

*Note:* Conversion factors for units: serum albumin in g/dL to  $\mu\text{mol/L}$ ,  $\times 1.45$ ; serum calcium in mg/dL to mmol/L,  $\times 0.2495$ ; serum phosphate in mg/dL to mmol/L,  $\times 0.3229$ ; C-reactive protein in mg/dL to mg/L,  $\times 10$ ; no conversion necessary for bicarbonate levels in mEq/L and mmol/L.

Abbreviations: MET, metabolic equivalent; NEAP, net endogenous acid production; eGFR, estimated glomerular filtration rate calculated using the CKD-EPI equation; UACR, urinary albumin-creatinine ratio; BMD, bone mineral density.

Data are expressed as mean (standard error (SE)) or percent (SE).
