# Supplementary material
Source: PubMed Central journal article supplement (PMC4305466)
Supplement: NIHMS618336-supplement-02.pdf [file NIHMS618336-supplement-02.pdf]

**Table S2. Multivariable Linear Regression Model of Participant Characteristics with Serum Bicarbonate Levels (mEq/L)**

| Characteristic                             | $\beta$ (95% CI)    | P      |
|--------------------------------------------|---------------------|--------|
| Age (per 10 years)                         | 0.26 (0.19,0.33)    | <0.001 |
| Men                                        | 0.78 (0.66,0.91)    | <0.001 |
| Race/Ethnicity                             |                     |        |
| Mexican American                           | -0.36 (-0.70,-0.03) | 0.03   |
| Non-Hispanic Black                         | 0.46 (0.19,0.72)    | 0.001  |
| Other                                      | 0.05 (-0.34,0.44)   | 0.8    |
| Body-mass index (per 1 kg/m <sup>2</sup> ) | -0.04 (-0.05,-0.04) | <0.001 |
| Poverty (<100% poverty index)              | -0.12 (-0.30,0.05)  | 0.2    |
| Less than high-school diploma              | -0.005 (-0.14,0.13) | 0.9    |
| Activity Level (MET-min/wk)                |                     |        |
| < 500                                      | -0.06 (-0.23,0.12)  | 0.5    |
| 500 – 2000                                 | -0.09 (-0.27,0.09)  | 0.3    |
| > 2000                                     | -0.06 (-0.27,0.14)  | 0.5    |
| Smoking                                    |                     |        |
| Former                                     | -0.16 (-0.31,-0.02) | 0.03   |
| Current                                    | -0.47 (-0.68,0.27)  | <0.001 |
| Estimated NEAP (per 10 mEq/day)            | -0.06 (-0.08,-0.04) | <0.001 |
| Fasting length $\leq 2$ hours              | 0.43 (0.11,0.76)    | 0.01   |
| Diuretic use                               | 0.97 (0.73,1.22)    | <0.001 |
| Calcium carbonate use                      | 0.13 (-0.26,0.53)   | 0.5    |
| Hypertension                               | -0.16 (-0.29,-0.03) | 0.02   |
| Diabetes Mellitus                          | -0.22 (-0.43,-0.01) | 0.04   |
| Cardiovascular disease                     | -0.33 (-0.53,-0.13) | 0.002  |
| eGFR (10 mL/min/1.73m <sup>2</sup> )       | 0.06 (0.01,0.10)    | 0.03   |
| UACR > 30 mg/g (%)                         | -0.17 (-0.37,0.04)  | 0.1    |
| Serum albumin (g/dL)                       | 0.39 (-0.05,0.84)   | 0.08   |
| Serum calcium (mg/dL)                      | 0.32 (-0.002,0.65)  | 0.05   |
| Serum phosphate (mg/dL)                    | 0.02 (-0.12,0.16)   | 0.8    |
| C-reactive protein $\geq 1.0$ mg/dL        | 0.08 (-0.12,0.28)   | 0.4    |

Abbreviations: MET, metabolic equivalent; BP, blood pressure; NEAP, net endogenous acid production; eGFR, estimated glomerular filtration rate; UACR, urinary albumin-creatinine ratio. Multivariable model adjusted for all variables listed in the Table. Reference categories are women for sex, non-Hispanic white for race/ethnicity; 0 Met-min/wk for activity level; non-smokers for smoking status; fasting length  $\leq 2$  hours; and CRP <1.0 mg/dL
