# Supplementary material
Source: PubMed Central journal article supplement (PMC4305466)
Supplement: NIHMS618336-supplement-03.pdf [file NIHMS618336-supplement-03.pdf]

**Item S1. Sensitivity Analyses****Table a. Sensitivity Analysis After Adjusting for Loop Diuretic Use**

|                                      | <b>Coefficient (95% CI)</b> |                            |                            |
|--------------------------------------|-----------------------------|----------------------------|----------------------------|
|                                      | Total Population            | Men                        | Women                      |
| <b>Lumbar BMD (g/cm<sup>2</sup>)</b> |                             |                            |                            |
| Continuous*                          | <b>0.006 (0.001,0.010)</b>  | <b>0.008 (0.002,0.015)</b> | <b>0.008 (0.001,0.014)</b> |
| < 24 mEq/L                           | [Ref]                       | [Ref]                      | [Ref]                      |
| 24 – 25 mEq/L                        | 0.004 (-0.006,0.014)        | -0.005 (-0.024,0.013)      | <b>0.016 (0.003,0.028)</b> |
| 25.1 – 26.9 mEq/L                    | 0.010 (-0.001,0.020)        | 0.010 (-0.006,0.026)       | <b>0.018 (0.004,0.031)</b> |
| ≥ 27 mEq/L                           | <b>0.016 (0.004,0.028)</b>  | <b>0.020 (0.002,0.038)</b> | <b>0.022 (0.005,0.039)</b> |
| P for trend                          | 0.007                       | 0.01                       | 0.008                      |
| <b>Total BMD (g/cm<sup>2</sup>)</b>  |                             |                            |                            |
| Continuous*                          | 0.003 (-0.0001, 0.007)      | 0.004 (-0.0004,0.009)      | <b>0.006 (0.001,0.010)</b> |
| < 24 mEq/L                           | [Ref]                       | [Ref]                      | [Ref]                      |
| 24 – 25 mEq/L                        | 0.006 (-0.003,0.016)        | 0.005 (-0.010,0.020)       | 0.009 (-0.0003,0.019)      |
| 25.1 – 26.9 mEq/L                    | 0.003 (-0.006,0.012)        | 0.005 (-0.008,0.018)       | 0.006 (-0.002,0.014)       |
| ≥ 27 mEq/L                           | 0.011 (-0.001,0.023)        | 0.012 (-0.002,0.027)       | <b>0.019 (0.005,0.033)</b> |
| P for trend                          | 0.1                         | 0.1                        | 0.01                       |

Abbreviations: eGFR, estimate glomerular filtration rate; BMD, bone mineral density; CI, confidence interval. **Bold** values indicate p<0.05.

Models adjusted for age, sex, race/ethnicity, body mass index, poverty, education, activity level, smoking status, fasting length, loop diuretic and calcium carbonate use, diagnosis of diabetes mellitus, hypertension and cardiovascular disease, eGFR, albuminuria, serum albumin, calcium, phosphate and C-reactive protein.

\* Per standard deviation higher serum bicarbonate (SD = 2.2 mEq/L).

**Table b. Sensitivity Analysis After Adjusting for Thiazide Diuretic Use**

|                                      | Coefficient (95% CI)       |                            |                            |
|--------------------------------------|----------------------------|----------------------------|----------------------------|
|                                      | Total Population           | Men                        | Women                      |
| <b>Lumbar BMD (g/cm<sup>2</sup>)</b> |                            |                            |                            |
| Continuous*                          | <b>0.005 (0.001,0.010)</b> | <b>0.009 (0.002,0.015)</b> | <b>0.007 (0.001,0.014)</b> |
| < 24 mEq/L                           | [Ref]                      | [Ref]                      | [Ref]                      |
| 24 – 25 mEq/L                        | 0.004 (-0.006,0.014)       | -0.006 (-0.024,0.013)      | <b>0.016 (0.003,0.028)</b> |
| 25.1 – 26.9 mEq/L                    | 0.009 (-0.001,0.020)       | 0.010 (-0.006,0.026)       | <b>0.017 (0.004,0.031)</b> |
| ≥ 27 mEq/L                           | <b>0.015 (0.003,0.028)</b> | <b>0.020 (0.002,0.038)</b> | <b>0.021 (0.005,0.038)</b> |
| P for trend                          | 0.01                       | 0.01                       | 0.01                       |
| <b>Total BMD (g/cm<sup>2</sup>)</b>  |                            |                            |                            |
| Continuous*                          | 0.003 (-0.001,0.007)       | 0.004 (-0.001,0.009)       | <b>0.005 (0.001,0.010)</b> |
| < 24 mEq/L                           | [Ref]                      | [Ref]                      | [Ref]                      |
| 24 – 25 mEq/L                        | 0.006 (-0.003,0.016)       | 0.005 (-0.010,0.020)       | 0.009 (-0.0003,0.019)      |
| 25.1 – 26.9 mEq/L                    | 0.003 (-0.006,0.012)       | 0.005 (-0.008,0.018)       | 0.006 (-0.002,0.014)       |
| ≥ 27 mEq/L                           | 0.011 (-0.001,0.023)       | 0.012 (-0.003,0.027)       | <b>0.019 (0.004,0.033)</b> |
| P for trend                          | 0.1                        | 0.1                        | 0.02                       |

Abbreviations: eGFR, estimate glomerular filtration rate; BMD, bone mineral density; CI, confidence interval. **Bold** values indicate p<0.05.

Models adjusted for age, sex, race/ethnicity, body mass index, poverty, education, activity level, smoking status, fasting length, thiazide diuretic and calcium carbonate use, diagnosis of diabetes mellitus, hypertension and cardiovascular disease, eGFR, albuminuria, serum albumin, calcium, phosphate and C-reactive protein.

\* Per standard deviation higher serum bicarbonate (SD = 2.2 mEq/L).

**Table c. Sensitivity Analysis After Adjusting for Loop and Thiazide Diuretic Use  
Association of Serum Bicarbonate with Lumbar and Total Bone Mineral Density**

|                                      | Coefficient (95% CI)       |                            |                            |
|--------------------------------------|----------------------------|----------------------------|----------------------------|
|                                      | Total Population           | Men                        | Women                      |
| <b>Lumbar BMD (g/cm<sup>2</sup>)</b> |                            |                            |                            |
| Continuous*                          | <b>0.005 (0.001,0.010)</b> | <b>0.008 (0.002,0.015)</b> | <b>0.007 (0.001,0.014)</b> |
| < 24 mEq/L                           | [Ref]                      | [Ref]                      | [Ref]                      |
| 24 – 25 mEq/L                        | 0.004 (-0.007,0.014)       | -0.005 (-0.024,0.013)      | <b>0.016 (0.003,0.028)</b> |
| 25.1 – 26.9 mEq/L                    | 0.009 (-0.001,0.020)       | 0.010 (-0.005,0.026)       | <b>0.017 (0.004,0.031)</b> |
| ≥ 27 mEq/L                           | <b>0.015 (0.003,0.028)</b> | <b>0.019 (0.001,0.037)</b> | <b>0.021 (0.004,0.038)</b> |
| P for trend                          | 0.01                       | 0.01                       | 0.01                       |
| <b>Total BMD (g/cm<sup>2</sup>)</b>  |                            |                            |                            |
| Continuous*                          | 0.003 (-0.001,0.007)       | 0.004 (-0.0005,0.009)      | <b>0.005 (0.001,0.010)</b> |
| < 24 mEq/L                           | [Ref]                      | [Ref]                      | [Ref]                      |
| 24 – 25 mEq/L                        | 0.006 (-0.003,0.016)       | 0.005 (-0.010,0.020)       | 0.009 (-0.0003,0.019)      |
| 25.1 – 26.9 mEq/L                    | 0.003 (-0.006,0.012)       | 0.005 (-0.008,0.018)       | 0.006 (-0.002,0.014)       |
| ≥ 27 mEq/L                           | 0.011 (-0.001,0.024)       | 0.013 (-0.002,0.027)       | <b>0.019 (0.005,0.033)</b> |
| P for trend                          | 0.1                        | 0.09                       | 0.01                       |

Abbreviations: eGFR, estimate glomerular filtration rate; BMD, bone mineral density; CI, confidence interval. **Bold** values indicate p<0.05.

Models adjusted for age, sex, race/ethnicity, body mass index, poverty, education, activity level, smoking status, fasting length, loop and thiazide diuretic and calcium carbonate use, diagnosis of diabetes mellitus, hypertension and cardiovascular disease, eGFR, albuminuria, serum albumin, calcium, phosphate and C-reactive protein.

\* Per standard deviation higher serum bicarbonate (SD = 2.2 mEq/L).

**Table d. Sensitivity Analysis After Adjustment for 25-Hydroxy Vitamin D Level (n=6,963)**

|                                      | Coefficient (95% CI)        |                       |                            |
|--------------------------------------|-----------------------------|-----------------------|----------------------------|
|                                      | Total Population            | Men                   | Women                      |
| <b>Lumbar BMD (g/cm<sup>2</sup>)</b> |                             |                       |                            |
| Continuous*                          | 0.005 (-0.0003,0.010)       | 0.006 (-0.001,0.014)  | 0.007 (-0.0003,0.015)      |
| < 24 mEq/L                           | [Ref]                       | [Ref]                 | [Ref]                      |
| 24 – 25 mEq/L                        | 0.002 (-0.010,0.014)        | -0.012 (-0.033,0.009) | <b>0.018 (0.004,0.031)</b> |
| 25.1 – 26.9 mEq/L                    | 0.007 (-0.005,0.019)        | 0.002 (-0.019,0.022)  | <b>0.018 (0.003,0.033)</b> |
| ≥ 27 mEq/L                           | 0.013 (-0.0006,0.026)       | 0.012 (-0.009,0.034)  | <b>0.021 (0.001,0.041)</b> |
| P for trend                          | 0.06                        | 0.1                   | 0.03                       |
| <b>Total BMD (g/cm<sup>2</sup>)</b>  |                             |                       |                            |
| Continuous*                          | <b>0.005 (0.0001,0.009)</b> | 0.005 (-0.001,0.010)  | <b>0.008 (0.002,0.013)</b> |
| < 24 mEq/L                           | [Ref]                       | [Ref]                 | [Ref]                      |
| 24 – 25 mEq/L                        | 0.003 (-0.009,0.015)        | -0.003 (-0.021,0.016) | 0.010 (-0.002,0.023)       |
| 25.1 – 26.9 mEq/L                    | 0.004 (-0.007,0.015)        | 0.001 (-0.016,0.017)  | <b>0.012 (0.004,0.021)</b> |
| ≥ 27 mEq/L                           | <b>0.014 (0.001,0.028)</b>  | 0.011 (-0.006,0.028)  | <b>0.025 (0.010,0.041)</b> |
| P for trend                          | 0.05                        | 0.2                   | 0.001                      |

Abbreviations: BMD, bone mineral density; CI, confidence interval. **Bold** values indicate p<0.05.

Models adjusted for age, sex, race/ethnicity, body mass index, poverty, education, activity level, smoking status, fasting length, diuretic and calcium carbonate use, diagnosis of diabetes mellitus, hypertension and cardiovascular disease, eGFR, albuminuria, serum albumin, calcium, phosphate, serum 25-hydroxy vitamin D level (2001-2004), C-reactive protein.

\* Per standard deviation higher serum bicarbonate (SD = 2.2 mEq/L).

**Table e. Sensitivity Analysis After Adjustment for Vitamin D Supplementation (n=7,002)**

|                                      | Coefficient (95% CI)        |                       |                             |
|--------------------------------------|-----------------------------|-----------------------|-----------------------------|
|                                      | Total Population            | Men                   | Women                       |
| <b>Lumbar BMD (g/cm<sup>2</sup>)</b> |                             |                       |                             |
| Continuous*                          | 0.005 (-0.0001,0.010)       | 0.006 (-0.001,0.014)  | <b>0.008 (0.0001,0.016)</b> |
| < 24 mEq/L                           | [Ref]                       | [Ref]                 | [Ref]                       |
| 24 – 25 mEq/L                        | 0.003 (-0.009,0.015)        | -0.011 (-0.032,0.010) | <b>0.018 (0.005,0.032)</b>  |
| 25.1 – 26.9 mEq/L                    | 0.007 (-0.006,0.019)        | 0.002 (-0.019,0.023)  | <b>0.018 (0.003,0.034)</b>  |
| ≥ 27 mEq/L                           | <b>0.013 (0.0001,0.027)</b> | 0.012 (-0.009,0.034)  | <b>0.023 (0.002,0.043)</b>  |
| P for trend                          | 0.05                        | 0.1                   | 0.02                        |
| <b>Total BMD (g/cm<sup>2</sup>)</b>  |                             |                       |                             |
| Continuous*                          | <b>0.005 (0.0002,0.010)</b> | 0.005 (-0.0005,0.010) | <b>0.008 (0.002,0.013)</b>  |
| < 24 mEq/L                           | [Ref]                       | [Ref]                 | [Ref]                       |
| 24 – 25 mEq/L                        | 0.004 (-0.008,0.016)        | -0.001 (-0.020,0.017) | 0.010 (-0.001,0.022)        |
| 25.1 – 26.9 mEq/L                    | 0.004 (-0.007,0.016)        | 0.001 (-0.016,0.018)  | <b>0.012 (0.003,0.021)</b>  |
| ≥ 27 mEq/L                           | <b>0.015 (0.001,0.029)</b>  | 0.012 (-0.006,0.029)  | <b>0.026 (0.011,0.042)</b>  |
| P for trend                          | 0.05                        | 0.2                   | 0.001                       |

Abbreviations: BMD, bone mineral density; CI, confidence interval. **Bold** values indicate p<0.05.

Models adjusted for age, sex, race/ethnicity, body mass index, poverty, education, activity level, smoking status, fasting length, diuretic and calcium carbonate use, diagnosis of diabetes mellitus, hypertension and cardiovascular disease, eGFR, albuminuria, serum albumin, calcium, phosphate, vitamin D supplementation (2001-2004), C-reactive protein.

\* Per standard deviation higher serum bicarbonate (SD = 2.2 mEq/L).

**Table f. Sensitivity Analysis using Serum Bicarbonate without Correction Factor (1999-2002)**

|                                      | Coefficient (95% CI)       |                            |                            |
|--------------------------------------|----------------------------|----------------------------|----------------------------|
|                                      | Total Population           | Men                        | Women                      |
| <b>Lumbar BMD (g/cm<sup>2</sup>)</b> |                            |                            |                            |
| Continuous*                          | <b>0.007 (0.001,0.013)</b> | 0.008 (-0.0004,0.016)      | <b>0.010 (0.003,0.018)</b> |
| < 23 mEq/L                           | [Ref]                      | [Ref]                      | [Ref]                      |
| 23 – 24 mEq/L                        | 0.008 (-0.003,0.018)       | 0.009 (-0.007,0.026)       | 0.012 (-0.002,0.026)       |
| 25.1 – 25.9 mEq/L                    | <b>0.015 (0.002,0.029)</b> | <b>0.022 (0.002,0.042)</b> | 0.021 (-0.003,0.045)       |
| ≥ 26 mEq/L                           | <b>0.019 (0.003,0.035)</b> | 0.022 (-0.003,0.046)       | <b>0.027 (0.007,0.047)</b> |
| P for trend                          | 0.02                       | 0.06                       | 0.01                       |
| <b>Total BMD (g/cm<sup>2</sup>)</b>  |                            |                            |                            |
| Continuous*                          | 0.004 (-0.001,0.008)       | 0.004 (-0.002,0.010)       | <b>0.006 (0.001,0.011)</b> |
| < 23 mEq/L                           | [Ref]                      | [Ref]                      | [Ref]                      |
| 23 – 24 mEq/L                        | 0.006 (-0.001,0.014)       | <b>0.013 (0.001,0.025)</b> | 0.003 (-0.006,0.012)       |
| 25.1 – 25.9 mEq/L                    | 0.008 (-0.003,0.020)       | 0.012 (-0.003,0.026)       | 0.013 (-0.001,0.028)       |
| ≥ 26 mEq/L                           | 0.012 (-0.002,0.025)       | 0.014 (-0.002,0.031)       | <b>0.018 (0.001,0.035)</b> |
| P for trend                          | 0.09                       | 0.1                        | 0.02                       |

Abbreviations: BMD, bone mineral density; CI, confidence interval. **Bold** values indicate p<0.05.

Models adjusted for age, sex, race/ethnicity, body mass index, poverty, education, activity level, smoking status, fasting length, diuretic and calcium carbonate use, diagnosis of diabetes mellitus, hypertension and cardiovascular disease, eGFR, albuminuria, serum albumin, calcium, phosphate, C-reactive protein.

\* Per standard deviation higher serum bicarbonate (SD = 2.2 mEq/L).

**Table g. Sensitivity Analysis of Logistic Regression for Participants >50 Years Old (n=2,072)**

|                             | OR (95% CI)      |                         |
|-----------------------------|------------------|-------------------------|
|                             | Men              | Women                   |
| <b>Low Lumbar Bone Mass</b> |                  |                         |
| Continuous*                 | 0.90 (0.78,1.04) | 0.91 (0.79,1.04)        |
| < 24 mEq/L                  | [Ref]            | [Ref]                   |
| 24 – 25 mEq/L               | 1.09 (0.54,2.21) | 0.94 (0.66,1.32)        |
| 25.1 – 26.9 mEq/L           | 1.14 (0.67,1.93) | 1.01 (0.73,1.41)        |
| ≥ 27 mEq/L                  | 0.73 (0.44,1.22) | 0.74 (0.52,1.06)        |
| P for trend                 | 0.2              | 0.2                     |
| <b>Low Total Bone Mass</b>  |                  |                         |
| Continuous*                 | 0.96 (0.83,1.12) | 0.90 (0.77,1.05)        |
| < 24 mEq/L                  | [Ref]            | [Ref]                   |
| 24 – 25 mEq/L               | 0.71 (0.49,1.04) | 0.96 (0.61,1.53)        |
| 25.1 – 26.9 mEq/L           | 0.80 (0.55,1.18) | 0.95 (0.57,1.58)        |
| ≥ 27 mEq/L                  | 0.82 (0.53,1.25) | <b>0.65 (0.43,0.99)</b> |
| P for trend                 | 0.5              | 0.08                    |

Abbreviations: OR, odds ratio; CI, confidence interval. **Bold** values indicate  $p < 0.05$ .

Models adjusted for age, race/ethnicity, body mass index, poverty, education, activity level, smoking status, fasting length, diuretic and calcium carbonate use, diagnosis of diabetes mellitus, hypertension and cardiovascular disease, eGFR, albuminuria, serum albumin, calcium, phosphate and C-reactive protein.

\* Per standard deviation higher serum bicarbonate (SD = 2.2 mEq/L).
